# Supplementary material for: On Turbulence Models and LiDAR Measurements for Wind Turbine Control
Source: Copernicus journal article supplement (doi:10.5194/wes-2021-51), 2021-06-01
Supplement: Supplementary file [file wes-2021-51-AC1-supplement.pdf]

## Author Response to Reviews of

# On Turbulence Models and LiDAR Measurements for Wind Turbine Control

Liang Dong, Wai Hou Lio, Eric Simley

*Wind Energy Science Discuss*, doi:10.5194/wes-2021-51

---

**RC: Reviewer Comment**,    **AR: Author Response**,     Manuscript text

Dear Reviewers,

We sincerely appreciate all valuable comments and suggestions. We have revised the manuscript based on your comments. You will find our responses to your comments below.

### 1. Reviewer #1

**RC:** *The paper numerically investigates the spectral coherence between a simulated lidar measurement of the wind inflow to a wind turbine on the one hand, and the rotor-effective wind speed (REWS) at the turbine on the other hand. The incoming wind field is simulated by two different, commonly used turbulence models, namely the Kaimal and the Mann model. Results are evaluated for three different rotor diameters, namely 52 m, 126 m, and 178 m. It is found that the above-mentioned coherence significantly differs between the turbulence models as well as between the rotor diameters. Namely, the coherence decreases with the rotor size, and this decrease is stronger for the Mann model.*

**RC:** *The methodology and investigations are based on results by Held and Mann (2019) where a significant difference in coherence was found between the same turbulence models. In that paper, only a 52 m rotor diameter was investigated, and additional validation against experimental field data was performed. As a consequence, it was found that the predictions of the Mann model came closer to reality than those of the Kaimal model.*

**RC:** *The paper under review investigates a relevant and interesting topic, namely systematic differences between turbulence models, and their relevance for wind turbine applications. The numerical investigations are performed systematically and they deliver clear results. The main conclusion of the paper is that the systematic differences in coherence depending on the turbulence model should be considered as uncertainties for relevant applications.*

**AR:** *We appreciate your interest and valuable comments on this topic.*

#### 1.1.

**RC:** *One fundamental weakness of the paper is that turbulence models, including the two under investigation, differ significantly from real turbulence. Conclusions from the results of the paper for real-world applications are therefore very difficult and should be discussed with care. Other than in Held and Mann (2019), no experimental validation was performed here.*

**AR:** *According to wind turbine design requirement in IEC standards[1], for the standard wind turbine classes, the turbulence model must satisfy the three requirements: the turbulence standard deviation, the longitudinal*

turbulence scale parameters, and a recognized model for the coherence. The random wind velocity field for the turbulence models shall satisfy the Kaimal model together with the coherence model described in Sec 2.1. As an alternative the Mann model can also be applied. So in this work, the Mann and the Kaimal model are selected for investigation, which is important for standard wind turbine design in wind energy industry.

AR: *The purpose of this work is not to analyze which turbulence model is more suitable for representing the real turbulence. Instead, this work focused on how to evaluate the benefit of LAC during the wind turbine design phase according to the IEC standards, and the importance of the turbulence model while the LAC is adopted is addressed.*

AR: *The following section has been revised.*

According to current wind turbine design requirements in the IEC standard [1], for the standard wind turbine classes the turbulence model must contain the following elements: the turbulence standard deviation, the longitudinal turbulence scale parameters, and a recognized model for the coherence. The standards recommend the use of either the Kaimal turbulence model, together with a standard exponential lateral-vertical coherence model, or the Mann turbulence model to represent the random wind velocity field. Although extensive research has been carried out on evaluating LiDAR measurement coherence, there is a clear knowledge gap regarding the impact of different turbulence models on the LiDAR measurement coherence. The wind field model used in most of the above-mentioned studies consists of the Kaimal turbulence spectrum and the lateral-vertical spatial coherence model defined in the IEC standard [1]. The impact of different turbulence models on the dynamic response of an offshore wind turbine has been evaluated by [2]; the results showed that as the rotor size becomes larger, the variation of the wind in time and space also becomes increasingly important. There is a need to evaluate the load reduction potential of LAC using different turbulence models, which is critical for determining the value creation of LAC during the wind turbine design phase. ...

AR: *This work also suggests that the experimental validation is critical, since the atmospheric conditions are different at different site, the turbine design with LAC feature should consider this site-specific parameters. This suggestion is included in Section 5.*

## 1.2.

RC: *The text of the paper is not strictly systematic. A more strict systematic would improve the text. Especially, conclusions are already drawn in section 4.3 (last paragraph), but they should be moved to section 5. In the conclusions themselves, these findings are missing. Moreover, two further important findings of the paper are completely missing:*

- *The rotor size influences the difference in coherence between the turbulence models.*
- *An experimental validation of the findings, especially for large rotors, is essential for further application.*

AR: *Thanks for this suggestion. We have reorganized the conclusion accordingly.*

### 1.3.

**RC:** *A few inappropriate terms make the understanding of the unnecessarily difficult. Those are Lidar measurement quality (PIL23): This term is used frequently throughout the paper. It does make no sense at all in a simulation study, because the quality of the lidar measurement is not accessible and also not investigated here. This causes unnecessary confusion. What is meant (to my understanding) is the quality of the prediction of the REWS by the two turbulence models, given the information of a simulated lidar measurement upstream of the rotor. The term should be replaced by something more appropriate, like "REWS prediction quality" (this is probably not the best term either), and it should be clarified and explained when first used. In contrast to this, the term "lidar measurement coherence", which is also used frequently, does actually make sense, even though no real measurement is performed.*

**AR:** *Agreed, this term does cause some unnecessary confusions for readers. The "LiDAR measurement quality" is replaced by "simulated measurement quality metrics". The term is clarified and explained in detail as follows.*

Three commonly used simulated measurement quality metrics for LAC application are defined in [3]: magnitude-squared coherence between the true rotor effective wind speed and the LiDAR-based estimate, mean square error (MSE) between the true rotor effective wind speed and the LiDAR-based estimate, and MSE between the generator speed and the rated generate speed.

### 1.4.

**RC:** *Value creation of LAC (PIL8): Without any relation the field measurements, it is not appropriate to speak of "value creation" in this context. There is no way to evaluate the real benefits of LAC based on the presented results.*

**AR:** *As mentioned in Section 1.1, the "value creation" means "the potential value creation of LAC based on simulations during the wind turbine design phase". The abstract has been revised.*

...In other words, the potential value creation of LAC based on simulations during the wind turbine design phase, evaluated using the Kaimal turbulence model, will be diminished if the Mann turbulence model is used instead. ...

**AR:** *According to the work [3], by optimizing the LiDAR scan pattern, the higher measurement coherence bandwidth can be achieved, but the cost of LiDAR will increase as well. Generally speaking, the lower the value of  $k_{0.5}$ , the lower the LAC benefits. Integrating LAC into the turbine design phase involves a trade-off optimization problem to consider the turbine cost and LiDAR cost simultaneously.*

**AR:** *The "value creation" is strongly dependent on the coherence bandwidth  $k_{0.5}$  as described in Section 4.2. It is feasible to evaluate the benefits, for example, normal power production simulation according to IEC standards can be performed using reference wind turbines and aero-elastic tool HAWC2, which remains future work. This description has been added to the conclusions.*

... Note that the impacts on the load reduction need to be further investigated using reference turbines and aero-elastic tools following the IEC standards. ...

1.5.

**RC:** *Lidar measurement error (P5L138): It is not clear what this term means here. Error of what compared to what exactly?*

**AR:** *To be more clear, we have changed "Lidar measurement error" to the coherence between the rotor effective wind speed and its estimated value base on LiDAR measurement.*

Otherwise, without the correlation of the  $v$  and  $w$  components the coherence between the REWS and its estimated value based on LiDAR measurements could be unrealistically high, because the contribution of the  $v$  and  $w$  components could be close to zero after spatial averaging along the LiDAR beams.

1.6.

**RC:** *Moreover, please make sure that all technical terms are clearly defined or explained at their first occurrence.*

**AR:** *We have checked all the technical terms to make sure they are explained at the first occurrence.*

1.7.

**RC:** *P7L159: "the choice of turbulence model strongly influences the coherence of LiDAR measurements". See above, "lidar measurement quality". Reformulate to what is actually meant.*

**AR:** *The description has been revised.*

So the findings above indicate that the choice of turbulence model strongly influences the correlation between the Lidar measurement and true rotor effective wind speed.

1.8.

**RC:** *P9L178: "the true velocity measured by a lidar". What is meant by "true velocity"? Is is the LOS component a a certain point? Keep in mind that velocity is a vector by definition. Make clear.*

**AR:** *The "true velocity" means the volume measurement should be modeled using range weighting function for a real scanning LiDAR system. The description has been revised.*

The velocity measured by a real scanning LiDAR is a spatial average of the LOS velocities along the LiDAR beam, which is described by the range weighting function.

1.9.

**RC:** *Section 4.1: Was the lidar measurement modeled after section 3.2? Was the REWS evaluated after section 3.3? What are the time constants in the measurement?*

**AR:** *Yes, the method of simulating LiDAR measurements is described in Section 3.2, and the method of calculating REWS is in Section 3.3.*

AR: I presume the "time constants" means the LiDAR scanning frequency. I have added a scanning frequency and a LOS measurement frequency in Table 2.

... For both LiDAR scan patterns, the scanning frequency for completing a full scan is 1 Hz, and the LOS measurement frequency is 4 Hz and 50 Hz based on commercial examples.

## 1.10.

RC: **Section 4.2: The discussion of eddy sizes (line 219 ff) is confusing. First, the mentioned integral length scale is questionable and will most probably depend strongly on the time window used for the analysis. Moreover, what is meant by "the eddy size" is probably "the size of the largest eddies", which in turn is a questionable quantity. A spherical eddy is hard to imagine. Moreover, if it would exist, pitching the blades to "feather" would not help in decreasing the loads. These aspects are, however, unnecessary for the relevant part of the discussion. Namely that, given Taylor's hypothesis of frozen turbulence, the smallest relevant time and length scale for collective pitch control is of the order of the rotor diameter. The authors should restrict the discussion to this aspect.**

AR: Thanks for the comment. We agreed that the "3D spherical eddy" is not clear and it makes the explanation more complicated. The irrelevant term has been removed. So here we revised the description and focused on the 1D-diameter eddy across the rotor. And a new reference [4] is cited here to help justify the argument.

AR: Regarding the description "pitch to feather", we agreed that to reduce the fatigue loads using LAC, the pitch should follow the wind variation, not just "pitch to feather". So, "pitch to feather" has been removed.

For reducing fatigue loads using LAC, detecting eddies with a length as small as 1D in the longitudinal direction is important, because the thrust load induced by eddies with diameters of 1D or larger across the rotor in the lateral and vertical directions can be mitigated using collective pitch control [4]; in turn, eddies covering the entire rotor disc in the lateral and vertical directions are expected to extend at least 1D in the longitudinal direction. Thus, the magnitude-squared coherence  $\gamma^2$  at  $k = 2\pi/D$  is the most critical metric.

## 2. Reviewer #2

### 2.1.

RC: **In this paper, the authors compare two different turbulence models (the Kaimal model and the Mann model) and two different LiDAR scanning protocols to assess their potential for LiDAR assisted control (LAC). The focus of this work is on larger rotor sizes. The comparisons are based on numerical implementations of the turbulence models and simulations of the LiDAR scanning protocols. The authors find a good agreement of the magnitude-squared coherence between simulated LiDAR measurements and the rotor effective wind speed with the theoretically expected ones.**

RC: **Overall, the work is interesting, clearly structured, and well written. The main finding is that the asserted coherence depends strongly on the specific type of turbulence model. In fact, it is shown that the assertion of the benefit for LAC depends more on the turbulence model than on the specific LiDAR scanning pattern.**

AR: We appreciate your interest and valuable comments on this topic.

2.2.

RC: ***This brings me to my main question. Whether LAC is beneficial or not ultimately depends on the coherence of the atmospheric turbulence. This means that the major question should be which turbulence model is better suited to capture atmospheric turbulence. In that sense, sentences like "the value creation of LAC, evaluated using the Kaimal turbulence model, will be diminished if the Mann turbulence model is used instead." seem inappropriate to me since no direct conclusions for field measurements can be drawn. I think the authors should clarify their scope and in particular the limitations of their study.***

AR: Thanks for the comment. This comment is similar to the comment Section 1.1.

AR: As mentioned in comment Section 1.1, the Mann and the Kaimal model are selected for investigation, which is important for standard wind turbine design in wind energy industry. The purpose of this work is not to analyze which turbulence model is more suitable for representing the real turbulence. Instead, this work focused on how to evaluate the benefit of LAC during the wind turbine design phase according to IEC standards, and the importance of the turbulence model while the LAC is adopted is addressed. This scope has been clarified as shown in Section 1.1.

AR: The potential benefits of LAC is highly dependent on the magnitude-squared coherence. Low coherence will result in low benefits as discussed in the manuscript Section 4.2.

2.3.

RC: ***Another question concerns the choice of parameters. Many of the parameters in this study are kept fixed, which makes me wonder how much the conclusions depend on the specific parameter choices. Can the authors comment on that?***

AR: The parameters of turbulence model is chosen according to IEC standard, which is commonly used for standard wind turbine design, and fit with the scope of this work.

AR: The parameters of LiDAR optimal scanning pattern are chosen according to the previous work [3].

2.4.

RC: ***Eq. (5): The argument of  $R_{ij}$  should be boldfaced.***

AR: Eq. (5) has been modified.

$$R_{ij}(\mathbf{r}) = \langle u_i(\mathbf{x})u_j(\mathbf{x} + \mathbf{r}) \rangle, \quad (1)$$

2.5.

RC: ***I don't understand the statement below eq. (7): "When the two indices  $i = j$ , then  $\Delta_y = \Delta_x = 0...$ " Can't I vary  $i, j, \Delta_x$ , and  $\Delta_y$  independently? I think this statement needs clarification.***

AR: For each pair of points  $i$  and  $j$ , there should be a specific separation in the  $x$  and  $y$  directions. So changing the indices will determine the  $\Delta_x$  and  $\Delta_y$ .

AR: *The statement is used to illustrate the auto-spectrum  $\Psi_{ii}(k_1)$  and  $\Psi_{jj}(k_1)$  in the denominator. The description has been revised.*

For the denominator in Eq.(7), when the two indices  $i = j$ , then  $\Delta_y = \Delta_z = 0$  and the wave number auto-spectrum  $\Psi_{ii}(k_1)$  and  $\Psi_{jj}(k_1)$  are expressed as

$$\Psi_{xx}(k_1) = \int_{-\infty}^{\infty} \int_{-\infty}^{\infty} \Phi_{xx}(\mathbf{k}) dk_2 dk_3, \quad (2)$$

where the subscript  $xx \in [ii, jj]$ .

## 2.6.

RC: *Line 114: I think "the" in "especially for the Mann model" should be deleted.*

AR: *"the" is deleted.*

## 2.7.

RC: *Eq. (9): The notation is a bit difficult to understand: Shouldn't all vectors be boldfaced? Perhaps it is worth checking the manuscript once more regarding the consistency of notation.*

AR: *To make it more clear, the description has been revised as follows.*

The line-of-sight (LOS) velocity at one measurement point from a LiDAR system can be expressed as:

$$v_{LOS} = -l_x u - l_y v - l_z w, \quad (3)$$

where  $\mathbf{l} = [l_x, l_y, l_z]$  denotes the unit vector in the direction that the beam is oriented,  $[u, v, w]$  denotes the wind speed vector at the measurement point. Note that the sign of the upwind direction is negative.

## References

- [1] IEC, "Wind energy generation systems-Part 1: Design requirements," tech. rep., International Electrotechnical Commission, Geneva, Switzerland, 2019.
- [2] A. Nybø, F. G. Nielsen, J. Reuder, M. J. Churchfield, and M. Godvik, "Evaluation of different wind fields for the investigation of the dynamic response of offshore wind turbines," *Wind Energy*, vol. 23, pp. 1810–1830, 9 2020.
- [3] E. Simley, H. Fürst, F. Haizmann, and D. Schlipf, "Optimizing Lidars for Wind Turbine Control Applications—Results from the IEA Wind Task 32 Workshop," *Remote Sensing*, vol. 10, p. 863, 6 2018.
- [4] D. Schlipf, H. Fürst, S. Raach, and F. Haizmann, "Systems Engineering for Lidar-Assisted Control: A Sequential Approach," *Journal of Physics: Conference Series*, vol. 1102, no. 1, 2018.

# On Turbulence Models and LiDAR Measurements for Wind Turbine Control

Liang Dong<sup>1</sup>, Wai Hou Lio<sup>1</sup>, and Eric Simley<sup>2</sup>

<sup>1</sup>Department of Wind Energy, Technical University of Denmark (DTU), Frederiksborgvej 399, 4000, Roskilde, Denmark

<sup>2</sup>National Renewable Energy Laboratory (NREL), 15013 Denver West Parkway, Golden, Colorado 80401, USA

**Correspondence:** Liang Dong (ldong@dtu.dk)

**Abstract.** To provide comprehensive information that will assist in making decisions regarding the adoption of LiDAR assisted control (LAC) in wind turbine design, this paper investigates the impact of different turbulence models on the coherence between the rotor effective wind speed and LiDAR measurement. First, the differences between the Kaimal and Mann models are discussed, including the power spectrum and spatial coherence. Next, two types of LiDAR systems are examined to analyze the LiDAR measurement coherence based on commercially available LiDAR scan patterns. Finally, numerical simulations have been performed to compare the LiDAR measurement coherence for different rotor sizes. This work confirms the association between the measurement coherence and the turbulence model. The results indicate that the LiDAR measurement coherence with the Mann turbulence model is lower than that with the Kaimal turbulence model. In other words, the [potential value creation of LAC based on simulations during the wind turbine design phase](#), evaluated using the Kaimal turbulence model, will be diminished if the Mann turbulence model is used instead. In particular, the difference in coherence is more significant for larger rotors. As a result, this paper suggests that the impacts of different turbulence models should be considered as uncertainties while evaluating the benefits of LAC.

## 1 Introduction

Turbine-mounted LiDAR sensors provide preview information about the inflow wind to be used for improving wind turbine control, which is referred to as wind turbine integrated LiDAR assisted control (LAC). LAC is a promising technology for reducing wind turbine loads and the levelized cost of energy (LCOE) ([Scholbrock et al., 2016; Simley et al., 2020](#)) ([Scholbrock et al., 2016; Simley et al., 2020; Schlipf et al., 2018](#)). The potential benefits have been demonstrated in several works by simulation (Schlipf et al., 2010; Bossanyi, 2013; Schlipf et al., 2013b; Bossanyi et al., 2014) as well as field experiments (Kumar et al., 2015; Fleming et al., 2014; Schlipf et al., 2014).

The topic of the optimal LiDAR scan pattern for wind energy applications is critical for the widespread deployment of LAC. Both practical considerations for overcoming the obstacles of LAC application and for optimizing LiDAR scan patterns were discussed in an International Energy Agency (IEA) Wind Task 32 workshop (Simley et al., 2018). [The correlation between the Three commonly used simulated measurement quality metrics for LAC application are defined in Simley et al. \(2018\): magnitude-squared coherence between the true rotor effective wind speeds-speed \(REWS\) and the LiDAR-based estimate,](#)



25 mean square error (MSE) between the true REWS and the LiDAR-based estimate, and MSE between the generator speed and the rated generate speed. The REWS is commonly used to indicate the rotor averaged wind condition. The correlation between the REWS measured by the LiDAR and experienced by the rotor has been discussed in Haizmann et al. (2015), Simley et al. (2012), and Schlipf et al. (2013a), in which the magnitude-squared coherence is suggested as a useful-key metric to quantify LiDAR-the measurement quality. A fundamental component of simulation-based LiDAR measurement coherence  
30 is the theoretical spatial coherence of the turbulence: (a) the transverse-and-vertical-lateral-vertical spatial coherence is defined in the International Electrotechnical Commission (IEC) design standard (IEC, 2019); (b) wind evolution models (Bossanyi, 2013; Simley and Pao, 2015) are defined in terms of longitudinal spatial coherence. Note that the actual coherence in the field could be different from the theoretical coherence, thus experimental validation by field testing is important as well.

According to current wind turbine design requirements in the IEC standard (IEC, 2019), for the standard wind turbine classes  
35 the turbulence model must contain the following elements: the turbulence standard deviation, the longitudinal turbulence scale parameters, and a recognized model for the coherence. The standards recommend the use of either the Kaimal turbulence model, together with a standard exponential lateral-vertical coherence model, or the Mann turbulence model to represent the random wind velocity field. Although extensive research has been carried out on evaluating LiDAR measurement coherence, there is a clear knowledge gap regarding the impact of different turbulence models on the LiDAR measurement coherence. The wind  
40 field model used in most of the above-mentioned studies consists of the Kaimal turbulence spectrum and the lateral-vertical spatial coherence model defined in the IEC standard (IEC, 2019). ~~However, there are two different turbulence models defined in the IEC standard: the Mann turbulence model and the Kaimal turbulence model.~~ The impact of different wind fields turbulence models on the dynamic response of an offshore wind turbine has been evaluated by Nybø et al. (2020)-; the results showed that as the rotor size becomes larger, the variation of the wind in time and space also becomes increasingly important. There  
45 is a need to evaluate the load reduction potential of LAC using different turbulence models, which is critical for determining the value creation of LAC during the wind turbine design phase. Held and Mann (2019) extended the previous works by Haizmann et al. (2015), Simley et al. (2012), and Schlipf et al. (2013a) to analyze LiDAR measurement coherence with both the Mann turbulence model and Kaimal turbulence model. The theoretical coherence results were compared to field data from a nacelle LiDAR mounted on a Vestas V52 wind turbine. The results showed that the experimental data fit better to the coherence predicted by the Mann turbulence model, and the prediction based on the Kaimal turbulence model underestimates the  
50 coherence. However, the coherence analysis focused solely on a turbine with a small rotor diameter of 52 m; the impact of different rotor sizes and LiDAR scan patterns on coherence have not been investigated ~~in the work (Held and Mann, 2019)~~ by Held and Mann (2019).

With the advent of larger rotor sizes and more flexible wind turbines, evaluating the value creation of LAC is becoming  
55 increasingly important. The analysis in this work is based on the framework proposed by Simley et al. (2018) and Held and Mann (2019). The specific objective of this study is to investigate the impact of different turbulence models recommended by the IEC standards on the LiDAR measurement coherence, especially for large rotor sizes (i.e., the Technical University of Denmark (DTU) 10-MW reference turbine with a rotor diameter of 178 m (Bak et al., 2013)), whereby the analysis can shed light on how to reasonably evaluate LAC benefits ~~-First, during the wind turbine design phase. First~~ the differences between the

60 Kaimal and Mann models are discussed. Then two types of commercial continuous wave (CW) LiDAR systems are examined to analyze the LiDAR measurement coherence, including a 4-beam LiDAR and 50-beam circular scan LiDAR. The LiDAR measurement model has been created based on work by Simley et al. (2011) and numerical simulations have been performed to compare the LiDAR measurement coherence.

The remainder of this paper is organized as follows: Section 2 briefly describes the different turbulence models and compares the power spectra. The LiDAR measurement model is established in Section 3. In Section 4, numerical simulations for different LiDAR scan patterns and rotor sizes are performed. ~~The conclusions~~ Conclusions and suggestions for future work are summarized in Section 5.

## 2 Preliminaries and evaluation of different turbulence models

Two different turbulence models are commonly used to evaluate the design loads in the IEC standard (IEC, 2019): the Kaimal spectrum with exponential lateral-vertical coherence model (Kaimal model) and the Mann turbulence model (Mann model). The turbulence models use similar power spectra, and the major difference is the spatial distribution of the wind velocities.

### 2.1 Kaimal model

The advantage of the Kaimal model is that the one-dimensional spectra are expressed as simple analytic expressions. The wind disturbance is described as turbulent velocity fluctuations, and is assumed to be a stationary and random vector field with zero-mean Gaussian statistics. The power spectral densities (PSD) of each wind ~~components~~ component are given in non-dimensional form:

$$\frac{f S_k(f)}{\sigma_k^2} = \frac{4f L_k / V_{\text{hub}}}{(1 + 6f L_k / V_{\text{hub}})^{5/3}}, \quad (1)$$

where  $f$  is the frequency in Hertz, while the subscript  $k$  denotes the index of the velocity component in the longitudinal  $u$ , lateral  $v$ , and upward  $w$  direction, respectively. The single-sided velocity component spectrum is denoted as  $S_k$ , while  $\sigma_k$  and  $L_k$  represent the standard deviation and integral length scale parameters of the velocity component, respectively. The wind speed at hub height is denoted as  $V_{\text{hub}}$ .

For the longitudinal velocity component  $u$ ,  $\sigma_u$  is the representative value of the turbulence standard deviation, and  $L_u$  is defined as  $L_u = 8.1\Lambda_u$ . For a modern wind turbine, the hub height is typically above  $z \geq 60$  m and the longitudinal length scale parameter is  $\Lambda_u = 42$  m.

85 The cross power spectral density (CPSD)  $S_{u_i, u_j}(f)$  between the wind at two spatially separated points  $u_i, u_j$  can be determined from the definition of spatial co-coherence  $\gamma_{i,j}$ :

$$\gamma_{i,j}(f) = \Re \left( \frac{S_{u_i, u_j}}{\sqrt{S_{u_i, u_i} S_{u_j, u_j}}} \right), \quad (2)$$

where  $S_{u_i, u_i}$  and  $S_{u_j, u_j}$  are the PSDs of the wind speed at two different locations,  $i$  and  $j$ . The symbol  $\Re$  denotes the real part of a complex number. Please note that the coherence can be split into a real part and an imaginary part, which are referred to as co-coherence and quad-coherence (Nybø et al., 2020). The coherence expressed in Eq. (2) is in the real part form.

According to the IEC standard (IEC, 2019), the following exponential coherence model can be used in conjunction with the Kaimal PSD:

$$\gamma_{i,j}(f) = \exp \left[ -12 \left( \left( \frac{fr}{V_{\text{hub}}} \right)^2 + \left( \frac{0.12r}{L_c} \right)^2 \right)^{0.5} \right], \quad (3)$$

where  $r$  is the magnitude of the distance between the two points projected onto a plane normal to the averaged wind direction and  $L_c = L_u$  is the coherence scale parameter. The definition in Eq. (3) ignores the quad-coherence, thus the wind velocity fluctuations are assumed to be in the same phase. This assumption may be reasonable for small rotor sizes, but can be questioned for larger rotor sizes (Eliassen and Obhrai, 2016).

## 2.2 Mann model

The Mann turbulence model (Mann, 1994) is a spectral tensor model based on von Karman's model, which combines rapid distortion theory (RDT) with considerations about eddy lifetimes. The RDT in the Mann model gives an equation for the evolution or the "stretching" of the spectral tensor, and the tensor will be more and more "anisotropic" with time. RDT will finally influence the transverse-vertical-lateral-vertical coherence in the rotor plane.

The three-dimensional wind field fluctuations around the mean wind speed  $\mathbf{u}(\mathbf{x})$  can be represented by the vector field

$$\mathbf{u}(\mathbf{x}) = \tilde{\mathbf{u}}(\mathbf{x}) - \mathbf{U}(\mathbf{x}) = (u_1, u_2, u_3) = (u, v, w), \quad (4)$$

where  $\tilde{\mathbf{u}}$  is the turbulent velocity field and  $\mathbf{U}(\mathbf{x})$  is the mean wind field.

Because of homogeneity, the covariance tensor is a function of the separation vector  $\mathbf{r}$  between two points, and is defined as follows:

$$R_{ij}(\underline{\mathbf{r}}) = \langle u_i(\mathbf{x}) u_j(\mathbf{x} + \mathbf{r}) \rangle, \quad (5)$$

where  $\langle \rangle$  denotes ensemble averaging.

All second order statistics of turbulence, such as variances and cross spectra, can be derived from the covariance tensor. The spectral tensor is given by:

$$\Phi_{ij}(\mathbf{k}) = \frac{1}{(2\pi)^3} \int R_{ij}(\mathbf{r}) e^{-i\mathbf{k} \cdot \mathbf{r}} d\mathbf{r}, \quad (6)$$

where  $\int d\mathbf{r} = \int_{-\infty}^{\infty} \int_{-\infty}^{\infty} \int_{-\infty}^{\infty} dr_1 dr_2 dr_3$ ,  $\mathbf{k} = (k_1, k_2, k_3)$  is the non-dimensional spatial wave number for the three component directions,  $k = 2\pi f / \bar{U}$ , and  $\bar{U}$  is the mean wind speed. The resulting spectral tensor components can be found in Annex C of the IEC standard (IEC, 2019).

For three-dimensional turbulent velocity vector  $\mathbf{u}(\mathbf{x})$ , the velocity components are determined from a decomposition of the spectral tensor and an approximation by discrete Fourier transform, following the procedure detailed in Mann (1998). Compared to the Kaimal spectrum and exponential coherence model, the advantage of using the Mann model to analyze LiDAR measurements is that it provides a three-dimensional spectral tensor. The Mann model includes correlation between the  $(u, v, w)$  components, whereas the Kaimal model has no correlation between different wind components.

The Mann model is based on three adjustable parameters:  $\alpha\epsilon^{2/3}$  (the Kolmogorov constant multiplied with the rate of the viscous dissipation of specific turbulent kinetic energy raised to the power of two-thirds), the length scale  $l$ , and the non-dimensional parameter  $\Gamma$  related to the lifetime of the eddies.

The co-coherence  $\gamma_{ij}$  for the spatial separations (grid point points  $i$  and  $j$ ) normal to the longitudinal direction is defined as

$$\gamma_{ij}(k_1, \Delta_y, \Delta_z) = \Re \left( \frac{\int_{-\infty}^{\infty} \int_{-\infty}^{\infty} \Phi_{ij}(\mathbf{k}) e^{ik_2 \Delta_y} e^{ik_3 \Delta_z} dk_2 dk_3}{\sqrt{\Psi_{ii}(k_1) \Psi_{jj}(k_1)}} \right), \quad (7)$$

where  $\Delta_y$  is the lateral separation distance and  $\Delta_z$  is the vertical separation distance. When the For the denominator in Eq. (7), when the two indices  $i = j$ , then  $\Delta_y = \Delta_z = 0$  and the wave number auto-spectrum  $\Psi_{ii}(k_1)$  is expressed as and  $\Psi_{jj}(k_1)$  are expressed as

$$\Psi_{\underline{ii}\underline{xx}}(k_1) = \int_{-\infty}^{\infty} \int_{-\infty}^{\infty} \Phi_{\underline{ii}\underline{xx}}(\mathbf{k}) dk_2 dk_3, \quad (8)$$

where the subscript  $\underline{xx} \in [\underline{ii}, \underline{jj}]$ .

### 2.3 Evaluation using different turbulence generators

The theoretical turbulence models are quite complicated, especially for the Mann model, although the application of the Mann model only requires three parameters ( $\alpha\epsilon^{2/3}$ ,  $l$ ,  $\Gamma$ ). Therefore, numerical simulations have been performed to compare the different turbulence models in this work.

#### 2.3.1 Coordinate system

The coordinate system of the wind box as well as the LiDAR scan patterns is shown in Fig. 1. The size of the wind box should cover the entire rotor disc. The directions of the wind components  $(u, v, w)$  are aligned with the directions of the coordinate system axes  $(x, y, z)$ . The LiDAR scan pattern will be elaborated in Section 3.2.

#### 2.3.2 Turbulence generator

To generate the wind box for further analysis, two different turbulence simulators are used. The Kaimal model can be generated using the turbulence simulator TurbSim (Jonkman and Buhl Jr., 2006), while the Mann model is generated by HAWC2 (Hansen et al., 2018).

All numerical simulations are performed for a wind field with mean wind speed  $\bar{U} = 12$  m/s and turbulence intensity given by the IEC Class A normal turbulence model (NTM). The parameters of the three-dimensional wind box are listed in Table 1.

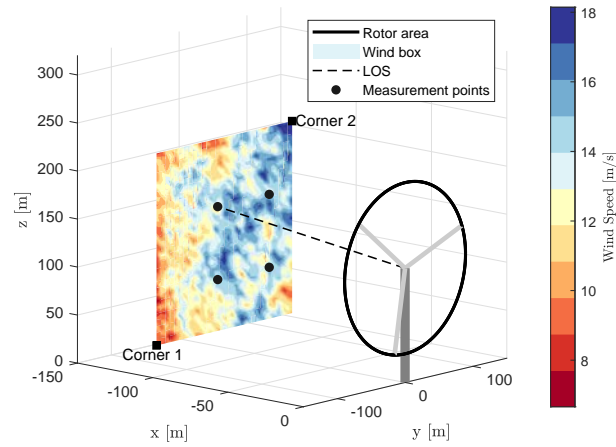

(a)

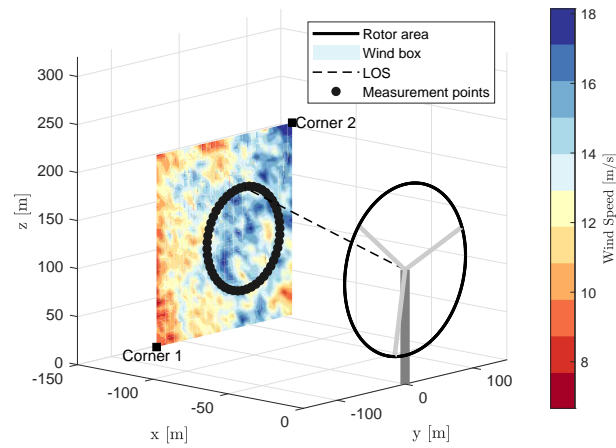

(b)

**Figure 1.** Coordinate system of wind box and LiDAR scan patterns. The wind box is shown using the color map. Two corners are marked as black squares (Corner 1 and Corner 2). Two commercial CW LiDAR scan patterns are shown: (a) 4-beam CW LiDAR; (b) 50-beam circular scan CW LiDAR. The dashed line represents the line-of-sight direction.

**Table 1.** Settings for generating the turbulence box.

| Symbol             | Description                        | Value               | Unit |
|--------------------|------------------------------------|---------------------|------|
| $T$                | length of time series              | 600                 | s    |
| $t_s$              | sampling time                      | 0.05                | s    |
| $z_h$              | center height of the grid          | 119                 | m    |
| $L_{\text{grid}}$  | width and height of the wind box   | 200                 | m    |
| $\alpha$           | power law wind shear exponent      | 0.2                 | -    |
| $\alpha_v$         | vertical inflow angle              | 0                   | deg  |
| $I_{\text{ref}}$   | reference turbulence intensity     | 0.16 (Class A, NTM) |      |
| $\bar{U}$          | mean wind speed                    | 12                  | m/s  |
| $N_{\text{grids}}$ | number of grid points              | 32                  | -    |
| $N_x$              | number of longitudinal grid points | 8192                | -    |

145 The grid size in the vertical and lateral directions is defined by the size of the wind box  $L_{\text{grid}}$  and number of grid points  $N_{\text{grids}}$ . Assuming Taylor’s hypothesis of frozen turbulence, the grid size along the mean wind direction is defined as  $\bar{U}T/N_x$ , where  $\bar{U}$  is the mean wind speed,  $T$  is the total time, and  $N_x$  is the number of longitudinal grid points.

Since the Mann turbulence fields are normally re-scaled to the specified turbulence intensity inside HAWC2, the parameter  $\alpha\epsilon^{2/3}$  is chosen to be 1 and the shear parameter  $\Gamma$  should be approximately 3.9 for neutral conditions. The length scale  $l$  is  
 150 recommended to be  $l = 0.7\Lambda_u$  for normal conditions.

The method used in TurbSim is the Veer’s approach (Veers, 1988) wherein the PSDs in Eq. (1) and coherence function in Eq. (3) are used to correlate the Fourier components of different points in the  $y - z$  plane. Then the inverse fast Fourier transform (IFFT) is applied to obtain the correlated time series at each grid point. Although in the IEC standard the coherence function is only applied to the  $u$  component, the Veer’s approach is extended to apply the coherence to the  $(v, w)$  components in  
 155 this work as well. It is assumed that the spatial coherence formula presented in Eq. (3) applies to all wind components  $(u, v, w)$ , and the length scales for the different components are the same as defined for the PSDs. Otherwise, ~~the LiDAR measurement error~~ without the correlation of the  $v$  and  $w$  components the coherence between the REWS and its estimated value based on LiDAR measurements could be unrealistically low/high, because the contribution of the  $v$  and  $w$  components could be close to zero after spatial averaging along the LiDAR beams (see Section 3.2). In contrast, the Mann model creates a turbulence field  
 160 that is fully correlated in the  $(x, y, z)$  directions.

### 2.3.3 Turbulence spectrum comparison

The differences between the Mann and Kaimal models are discussed in this section.

Fig. 2 shows the theoretical co-coherence  $\gamma_{i,j}$  at different separation distances, in which the lateral separation distance  $\Delta_y$  and vertical separation distance  $\Delta_z$  are selected to be 10 m, 30 m, and 50 m. Some interesting findings are:

- 165 1. A clear trend can be seen in Fig. 2a wherein the lateral co-coherence reduces as the lateral separation distance increases. With the small separation distance 10 m, the coherence with the Mann model is higher than with the Kaimal model. Conversely, with increasing separation distance, the co-coherence with the Mann model falls sharply compared with the co-coherence with the Kaimal model; the co-coherence with the Mann model is far below the co-coherence with the Kaimal model for  $\Delta_y = 50$  m.
- 170 2. For vertical separations in Fig. 2b, the co-coherence with the Mann model is always higher than that with the Kaimal model for low wave numbers. Unlike the lateral co-coherence, the vertical co-coherence does not drastically decrease with increasing separation distance.
- 175 3. The co-coherence with the Mann model is negative in some frequency ranges, which is not the case for the exponential coherence model with the Kaimal model expressed in Eq. (3). This implies an opposite phase of the wind components for some frequencies. Chougule et al. (2012) investigated the vertical cross-spectral phases in neutral atmospheric flow; the work demonstrated that the phase angle of the wind component  $u$  increases with stream-wise wave number and vertical separation distance.

With the advent of larger rotor sizes, LiDAR measurements must scan a larger area upstream of the rotor. So the findings above indicate that the choice of turbulence model strongly influences the ~~coherence of LiDAR measurements~~correlation between the LiDAR measurement and true REWS. This impact should be considered while evaluating the benefits of LAC.

180

### 3 Modeling of LiDAR wind speed measurements

#### 3.1 LiDAR coordinate system

Two different scan patterns based on commercial nacelle-mounted LiDARs are investigated here to illustrate the impact of different turbulence models on LiDAR measurement ~~quality~~coherence: a 4-beam scan pattern (Fig. 1a) and a 50-beam circular scan pattern (Fig. 1b). The LiDAR is mounted on the nacelle and the scan pattern may contain many different measurement points as shown in Fig. 1. Each scan pattern is further defined by the upstream preview distance  $d$  in the  $x$  direction and radial distance  $r$  between the scan point and the hub center in  $y - z$  plane. The LiDAR is assumed to be installed at the hub center for simplicity.

185

As suggested by Simley et al. (2018), the optimal LiDAR scan radius and preview distance used to achieve the best representation of the actual wind variables of interest that interact with the turbine can be expressed in non-dimensional units relative to the rotor radius. Coherence bandwidth is commonly used as a LiDAR measurement performance metric for LAC, and will be described in detail in Section 4.2. The optimal scan parameters for maximizing the coherence bandwidth are summarized in Table 2 and the LiDAR scan parameters are defined accordingly in this work. For both LiDAR scan patterns, the scanning frequency for completing a full scan is 1 Hz, and the line-of-sight (LOS) measurement frequency is 4 Hz and 50 Hz based on commercial examples.

190

195

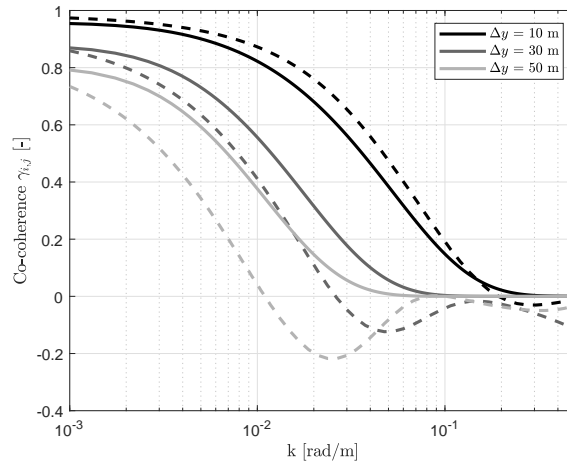

(a)

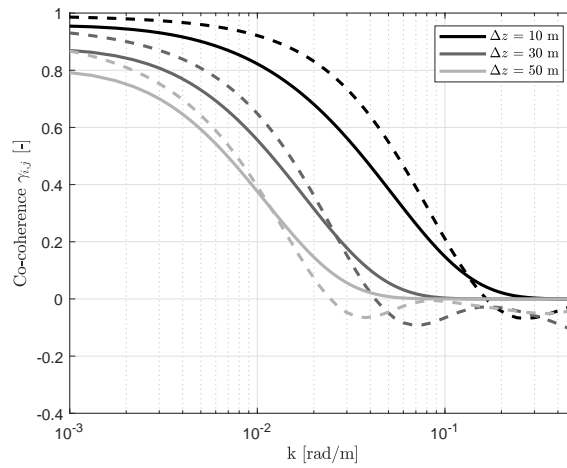

(b)

**Figure 2.** Co-coherence at different separation distances.  $\Delta_y$  and  $\Delta_z$  represent the lateral and vertical separation distances, respectively. (a) Lateral co-coherence,  $\Delta_z = 0$  m; (b) Vertical co-coherence,  $\Delta_y = 0$  m. Dashed lines denote the Mann model and solid lines denote the Kaimal model.



### 3.2 LiDAR simulator

The ~~line-of-sight (LOS) velocity~~ LOS velocity at one measurement point from a LiDAR system can be expressed as:

$$v_{LOS} = -l_x u - l_y v - l_z w, \quad (9)$$

where  ~~$\mathbf{l} = [l_x, l_y, l_z]$~~   $\mathbf{l} = [l_x, l_y, l_z]$  denotes the unit vector in the direction that the beam is oriented and  $[u, v, w]$  denotes the  
200 wind speed vector at the measurement point. Note that the sign of the upwind direction is negative.

The ~~true~~-velocity measured by a real scanning LiDAR is a spatial average of the LOS velocities along the LiDAR beam, which is described by the range weighting function. The range weighting function for continuous-wave LiDARs is expressed as follows (Simley et al., 2014):

$$W_L(F, \Delta) = \frac{K_N}{\Delta^2 + (1 - \frac{\Delta}{F})^2 R_R^2}, \quad (10)$$

205 where  $F$  denotes the LiDAR focal distance,  $\Delta$  denotes the distance from the focus position along the beam direction, and  $K_N$   
is a normalizing factor so that the integral of  $W_L$  from  $-\infty$  to  $\infty$  gives unity.  $R_R$  is the Rayleigh range and is given by:

$$R_R = \frac{\pi a_2^2}{\lambda}, \quad (11)$$

where  $\lambda$  is the laser wavelength and  $a_2$  is the beam radius at the output lens, which is calculated for the point at which the  
intensity has dropped to  $e^{-2}$  of its value at the beam centre. The LiDAR beam radius  $a_2$  takes the value 28 mm, which is broadly  
210 equivalent to the beam radius for current commercial LiDAR products (Pena et al., 2015). The wavelength  $\lambda$  is assumed to be  
the telecommunications wavelength of  $1.55 \times 10^{-6}$  m. More details regarding LiDAR modeling can be found in Simley et al.  
(2014).

### 3.3 Rotor effective wind speed reconstruction

The ~~rotor effective wind speed (REWS) is commonly used to indicate the rotor averaged wind condition. The REWS is~~ REWS  
215 is modeled as a sum of the  $u$  component wind speeds across the entire rotor disk area, assuming  $N_p$  points on the rotor disk:

$$u_{\text{eff}} = \frac{1}{N_p} \sum_{i=1}^{N_p} u_i. \quad (12)$$

The method of reconstructing the ~~rotor effective wind speed~~ REWS from LiDAR measurements has been discussed by  
Schlipf et al. (2011). The LiDAR can only measure the wind speed component along the LOS; therefore, at least three  
beams are needed to estimate the three-dimensional wind vector at a single point. This limitation is referred to as the cy-  
220 clops dilemma (Schlipf et al., 2011). Due to the cyclops dilemma and for the purpose of collective blade pitch control, the most  
common assumptions for reconstructing wind speeds from LiDAR measurements are:

1. ~~no vertical  $w$  and~~ No lateral  $v$  ~~wind component~~ or vertical  $w$  wind components,
2. ~~no~~ No shears or inflow angles.

**Table 2.** The optimal LiDAR scan parameters for maximizing coherence bandwidth. Optimal scan radii  $r$  and preview distances  $d$  are expressed in non-dimensional units normalized by the rotor radius  $R$ . The parameters are chosen according to work by Simley et al. (2018). The frequency  $f_S$  and  $f_L$  are based on commercial examples.

| Symbol   | Description                           | <del>4-Beam-CW</del> <u>4-beam</u> | <del>Circular-Scan</del> <u>50-beam</u> | Unit |
|----------|---------------------------------------|------------------------------------|-----------------------------------------|------|
| $r$      | <u>optimal</u> scan radius            | $0.5R$                             | $0.6R$                                  | -    |
| $d$      | <u>optimal</u> preview distance       | $1.2R$                             | $1.2R$                                  | -    |
| $\theta$ | <u>optimal</u> cone angle of LOS beam | 22.6                               | 26.6                                    | deg  |
| $f_S$    | <u>scanning frequency</u>             | <u>1</u>                           | <u>1</u>                                | Hz   |
| $f_L$    | <u>LOS measurement frequency</u>      | <u>4</u>                           | <u>50</u>                               | Hz   |
| height   |                                       |                                    |                                         |      |

The solution for estimating the ~~rotor-effective-wind-speed~~ REWS from LOS measurements is given by

$$225 \quad u_{\text{lid}} = -\frac{1}{N} \sum_{i=1}^N \frac{v_{\text{los},i}}{l_{x,i}}, \quad (13)$$

where  $N$  denotes the number of unique beams and  $l_{x,i}$  denotes the  $x$  component of the orientation of beam  $i$ . The wind speed estimate  $u_{\text{lid}}$  represents the average wind speed for a LiDAR measuring  $N$  points upstream of the turbine.

## 4 Influence of different turbulence models on LiDAR measurement coherence

### 4.1 Numerical simulation settings

230 In order to investigate the impact of different turbulence models on LiDAR measurement coherence, numerical simulations have been performed. Apart from the Vestas V52 with a 52-m rotor diameter, two other reference wind turbines are used, including the National Renewable Energy Laboratory (NREL) 5-MW reference turbine with a 126-m rotor diameter (Jonkman et al., 2009) and the DTU 10-MW reference turbine with a 178-m rotor diameter. These two rotor sizes represent typical values for onshore and offshore turbines, respectively.

235 The numerical simulations include 18 random turbulence boxes with different seeds for each turbulence model. The simulation time is 600 s. Therefore, the combination of two types of LiDARs, three different rotor sizes, and two turbulence models results in 12 separate scenarios, and 18 random realizations for each scenario.

### 4.2 Criteria for evaluating measurement quality and benefits

For indicating the measurement quality, the wave number  $k$  at which the magnitude-squared coherence  $\gamma^2$  between  $u_{\text{lid}}$  in Eq. (13) and  $u_{\text{eff}}$  in Eq. (12) drops below 0.5 is commonly used as a performance metric (~~Schlipf et al., 2013b~~) (Schlipf et al., 2013b, 2018). This metric is referred to as the coherence bandwidth  $k_{0.5}$  in this work. The wave number  ~~$k = 2\pi/L$  is is inversely proportional to the eddy size in the longitudinal direction. So, the inverse of the eddy diameter, where the integral length scale  $L$  is~~

~~representative of the eddy size at a particular location. So the~~ smallest detectable eddy size measured by a LiDAR is defined by the wave number  $k_{0.5}$ . In other words, the smallest detectable eddy can be interpreted as the eddy size that can be captured  
245 with a correlation of 50%.

~~The eddy can be assumed to be a three-dimensional spherical structure, which will move along the mean wind flow direction and eventually interact with the turbine rotor. The~~ For reducing fatigue loads using LAC, detecting eddies with a length as small as  $1D$  in the longitudinal direction is important, because the thrust load induced by ~~a~~ eddies with diameters of  $1D$  diameter eddy or larger across the rotor in the lateral and vertical directions can be mitigated ~~by pitching the blades to feather.~~  
250 In addition, using collective pitch control (Schlipf et al., 2018); in turn, eddies covering the entire rotor disc in the lateral and vertical directions are expected to extend at least  $1D$  in the ~~eddy size in the longitudinal direction is inversely proportional to the frequency at which the eddy interacts with the turbine, which in turn drives the required control system bandwidth needed to respond to the wind disturbance. For LiDAR-assisted collective pitch control, if the LiDAR can accurately capture the trend of  $1D$ -diameter eddies, then the pitch action can effectively reduce the thrust variation.~~ longitudinal direction. Thus,  
255 the magnitude-squared coherence  $\gamma^2$  at  $k = 2\pi/D$  is the most critical metric.

By optimizing the LiDAR scan pattern, the ~~highest~~ measurement coherence bandwidth can be achieved ~~maximized~~, but the cost of the LiDAR will increase as well. Meanwhile, the benefits of fatigue load reduction may reach a plateau. Generally speaking, the lower the value of  $k_{0.5}$ , the lower the LAC benefits. Integrating LAC into the turbine design phase involves a trade-off optimization problem to consider the turbine cost and LiDAR cost simultaneously.

### 260 4.3 Coherence analysis

Based on the simulation results, the magnitude-squared coherence  $\gamma^2$  between the LiDAR measurements and ~~rotor effective wind speeds~~ REWS are presented in Fig. 3 for the different scenarios investigated. For brevity, the dash-dot line labeled as  $1D$  represents the wave number corresponding to the rotor diameter  $D$ , whereas  $2D$  indicates the wave number corresponding to two rotor diameters. It can be clearly seen that the 50-beam circular scan LiDAR can achieve higher measurement coherence  
265 compared to the 4-beam LiDAR. For the NREL 5-MW turbine and the Kaimal model (see Fig. 3 (c) - (d)), the maximum coherence bandwidth  $k_{0.5}$  is approximately 0.03 rad/m for the 4-beam scan and 0.05 rad/s m for the 50-beam scan. These results corroborate the findings of previous work by Simley et al. (2018).

The key findings of this study are included in the following discussion. For brevity, the magnitude-squared coherence with the Mann model is represented by  $\gamma_{\text{Mann}}^2$  and the magnitude-squared coherence with the Kaimal model is represented by  
270  $\gamma_{\text{Kaimal}}^2$ . Corresponding theoretical coherence curves are also included in this figure following methods described in work by Held and Mann (2019) and Schlipf et al. (2013a).

1. For the Vestas V52 turbine in Fig. 3 (a) - (b),  $\gamma_{\text{Mann}}^2$  is higher than  $\gamma_{\text{Kaimal}}^2$  in the low wave number region  $k \leq 0.06$  rad/m, which aligns with the findings of the work by Held and Mann (2019), in which the authors suggested that the Kaimal model gave a slight underestimation of the measurement coherence for a 52-m rotor diameter, and the coherence  
275 predicted from the Kaimal model is lower than the coherence predicted from the Mann model.

2. For the NREL 5-MW turbine in Fig. 3 (c) - (d),  $\gamma_{\text{Mann}}^2$  is slightly higher than  $\gamma_{\text{Kaimal}}^2$  for low wave numbers. Then, the coherence starts to separate around  $2D$ . Specifically,  $\gamma_{\text{Mann}}^2$  decreases more sharply than  $\gamma_{\text{Kaimal}}^2$  when  $k$  exceeds  $2D$ .
3. For the DTU 10-MW turbine in Fig. 3 (e) - (f), the trend follows the trend with the NREL 5-MW turbine, but  $\gamma_{\text{Mann}}^2$  is considerably lower than  $\gamma_{\text{Kaimal}}^2$ . The coherence  $\gamma_{\text{Mann}}^2$  drastically decreases before  $2D$ . For increasing wave numbers, larger discrepancies are noticeable between  $\gamma_{\text{Mann}}^2$  and  $\gamma_{\text{Kaimal}}^2$ .
4. The additional measurement points with the circular scan provide an obvious improvement in measurement coherence in the frequency band  $k \in [\frac{2\pi}{2D}, \frac{2\pi}{1D}]$ . The maximum coherence bandwidth  $k_{0.5}$  can reach  $1D$  with the 50-beam circular scan. The Kaimal model indicates that the 50-beam circular scan is a better scan pattern and can lead to realizing the full potential benefits of LiDAR assisted collective pitch control. Surprisingly, the maximum coherence bandwidth  $k_{0.5}$  with the Mann model is far below  $1D$ , which will lead to lower benefits during the wind turbine design phase.

## 5 Conclusions

A novel finding in this work is that the coherence with the Mann model is lower than that with the Kaimal model, ~~which has not previously been found in the literature.~~ for large rotors, and this difference becomes larger with increasing rotor size. Conversely, for small rotor sizes, the coherence with the Mann model is higher than that with the Kaimal model. The differences between  $\gamma_{\text{Mann}}^2$  and  $\gamma_{\text{Kaimal}}^2$  are significant. These results are in accord with the theoretical coherence shown in Fig. 2, indicating lower coherence with the Mann model for larger separation distances.

In summary, these results provide important insights into the impact of different turbulence models on LiDAR measurement coherence. ~~The differences between  $\gamma_{\text{Mann}}^2$  and  $\gamma_{\text{Kaimal}}^2$  are significant.~~ If the wind conditions at a site agree more closely with the Mann model, the lower coherence with the Mann model will diminish the advantages of LAC because inappropriate blade pitch actions in response to the LiDAR measurements will deteriorate the turbine structural loading. It can therefore be suggested that the turbulence model needs to be carefully considered while integrating the LAC solution with larger-rotor turbine designs.

~~Magnitude-squared coherence  $\gamma^2$  between LiDAR measurements and the rotor effective wind speed. The left column contains results for the 4-beam scan pattern. The right column represents the 50-beam circular scan pattern. From top to bottom, the plots show results for the Vestas V52 turbine, NREL 5-MW turbine and DTU 10-MW turbine. The dash-dot lines labeled  $1D$  and  $2D$  represent the wave numbers  $k = \frac{2\pi}{D}$  and  $k = \frac{2\pi}{2D}$ , respectively. In the legend, "theory" denotes the theoretical coherence.~~

This work confirms the association between LiDAR measurement coherence ~~and~~, the turbulence model, and rotor size. Our results suggest that this impact should be considered as an uncertainty when evaluating the benefits of LAC during the wind turbine design phase. Note that the impacts on the load reduction need to be further investigated using reference turbines and aero-elastic tools following the IEC standards. More broadly, ~~research is also needed to determine which kind of LiDAR is most suitable for site-specific atmospheric conditions. Further research~~ further research should be undertaken to provide guidelines

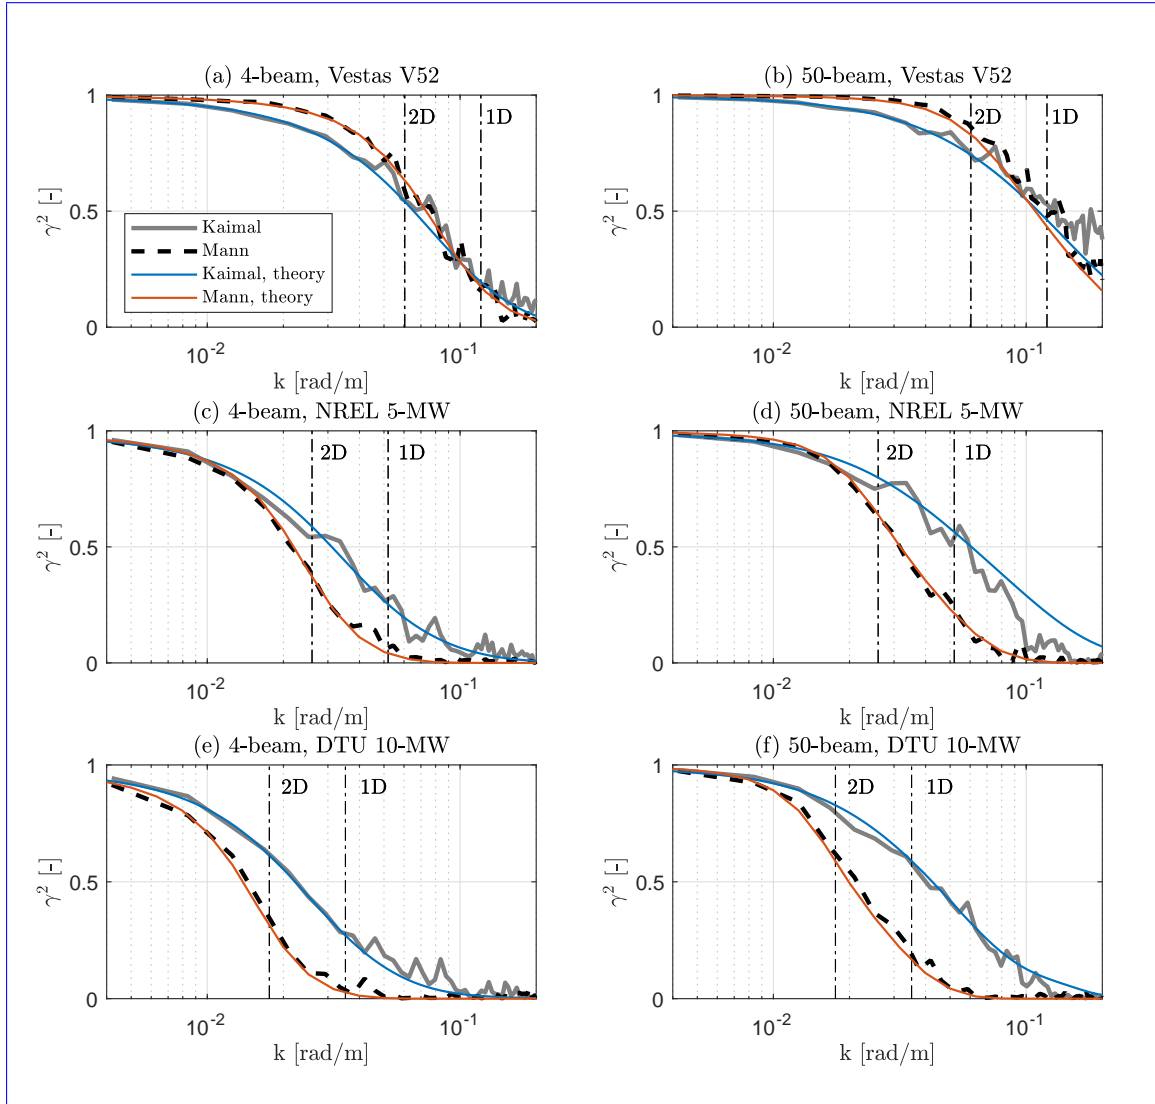

**Figure 3.** Magnitude-squared coherence  $\gamma^2$  between LiDAR measurements and the REWS. The left column contains results for the 4-beam scan pattern. The right column represents the 50-beam circular scan pattern. From top to bottom, the plots show results for the Vestas V52 turbine, NREL 5-MW turbine, and DTU 10-MW turbine. The dash-dot lines labeled 1D and 2D represent the wave numbers  $k = \frac{2\pi}{D}$  and  $k = \frac{2\pi}{3D}$ , respectively. In the legend, "theory" denotes the theoretical coherence.

on how to determine the optimal scan pattern for different ~~turbulence~~ site-specific atmospheric conditions and rotor sizes. Field validation is strongly recommended to mitigate the risk induced by site-specific wind conditions if LAC is adopted, especially for large rotors.

*Data availability.* The turbulence box data could be made available on request.

*Author contributions.* Liang Dong: Conceptualization, Methodology, Software, Investigation, Writing - original draft. Wai Hou Lio: Conceptualization, Methodology, Investigation, Writing - original draft. Eric Simley: Methodology, Investigation, Writing - original draft.

*Competing interests.* The authors declare that they have no conflict of interest.

315 *Acknowledgements.* This research was supported by the Energy Technology Development and Demonstration Program (EUDP), LiDAR assisted control for reliability improvement (LICOREIM, Grant No. 64019-0580).

The authors also want to thank Jakob Mann for providing the inputs of theoretical coherence results with the Mann model, and his suggestions on the manuscript.

320 This work was authored in part by the National Renewable Energy Laboratory, operated by Alliance for Sustainable Energy, LLC, for the U.S. Department of Energy (DOE) under Contract No. DE-AC36-08GO28308. Funding provided by the U.S. Department of Energy Office of Energy Efficiency and Renewable Energy Wind Energy Technologies Office. The views expressed in the article do not necessarily represent the views of the DOE or the U.S. Government. The U.S. Government retains and the publisher, by accepting the article for publication, acknowledges that the U.S. Government retains a nonexclusive, paid-up, irrevocable, worldwide license to publish or reproduce the published form of this work, or allow others to do so, for U.S. Government purposes.

## 325 **References**

- Bak, C., Zahle, F., Bitsche, R., Yde, A., Henriksen, L. C., Natarajan, A., and Hansen, M. H.: Description of the DTU 10 MW Reference Wind Turbine, Tech. rep., DTU Wind Energy Report-I-0092, DTU Wind Energy, 2013.
- Bossanyi, E.: Un-freezing the turbulence: application to LiDAR-assisted wind turbine control, *IET Renewable Power Generation*, 7, 321–329, 2013.
- 330 Bossanyi, E., Kumar, A., and Hugues-Salas, O.: Wind turbine control applications of turbine-mounted LIDAR, in: *Journal of Physics: Conference Series*, vol. 555, p. 012011, IOP Publishing, 2014.
- Chougule, A., Mann, J., Kelly, M., Sun, J., Lenschow, D. H., and Patton, E. G.: Vertical cross-spectral phases in neutral atmospheric flow, *Journal of Turbulence*, 13, N36, <https://doi.org/10.1080/14685248.2012.711524>, 2012.
- Eliassen, L. and Obhrai, C.: Coherence of Turbulent Wind under Neutral Wind Conditions at FINO1, in: *Energy Procedia*, vol. 94, pp. 388–398, Elsevier Ltd, <https://doi.org/10.1016/j.egypro.2016.09.199>, 2016.
- 335 Fleming, P. A., Scholbrock, A., Jehu, A., Davoust, S., Osler, E., Wright, A. D., and Clifton, A.: Field-test results using a nacelle-mounted lidar for improving wind turbine power capture by reducing yaw misalignment, in: *Journal of Physics: Conference Series*, vol. 524, p. 012002, IOP Publishing, 2014.
- Haizmann, F., Schlipf, D., and Cheng, P. W.: Correlation-model of rotor-effective wind shears and wind speed for lidar-based individual pitch control, 2015.
- 340 Hansen, M. H., Henriksen, L. C., Tibaldi, C., Bergami, L., Verelst, D., Pirrung, G., and Riva, R.: HAWCStab2: User Manual, Tech. Rep. October, DTU Wind Energy, [www.hawcstab2.vindenergi.dtu.dk](http://www.hawcstab2.vindenergi.dtu.dk), 2018.
- Held, D. P. and Mann, J.: Lidar estimation of rotor-effective wind speed – an experimental comparison, *Wind Energy Science*, 4, 421–438, <https://doi.org/10.5194/wes-4-421-2019>, 2019.
- 345 IEC: Wind energy generation systems-Part 1: Design requirements, Tech. rep., International Electrotechnical Commission, Geneva, Switzerland, 2019.
- Jonkman, B. J. and Buhl Jr., M. L.: TurbSim user’s guide, Tech. rep., Technical Report NREL/TP-500-39797, National Renewable Energy Laboratory, 2006.
- Jonkman, J., Butterfield, S., Musial, W., and Scott, G.: Definition of a 5 MW Reference Wind Turbine, Tech. rep., Technical Report NREL/TP-500-38050, National Renewable Energy Laboratory, 2009.
- 350 Kumar, A. A., Bossanyi, E. A., Scholbrock, A. K., Fleming, P., Boquet, M., and Krishnamurthy, R.: Field Testing of LIDAR-Assisted Feedforward Control Algorithms for Improved Speed Control and Fatigue Load Reduction on a 600-kW Wind Turbine, Tech. rep., National Renewable Energy Lab. (NREL), Golden, CO (United States), 2015.
- Mann, J.: The Spatial Structure of Neutral Atmospheric Surface-Layer Turbulence, *Journal of Fluid Mechanics*, 273, 141–168, <https://doi.org/10.1017/S0022112094001886>, 1994.
- 355 Mann, J.: Wind field simulation, *Probabilistic Engineering Mechanics*, 13, 269–282, [https://doi.org/10.1016/s0266-8920\(97\)00036-2](https://doi.org/10.1016/s0266-8920(97)00036-2), 1998.
- Nybø, A., Nielsen, F. G., Reuder, J., Churchfield, M. J., and Godvik, M.: Evaluation of different wind fields for the investigation of the dynamic response of offshore wind turbines, *Wind Energy*, 23, 1810–1830, <https://doi.org/10.1002/we.2518>, 2020.
- Pena, A., Eds, C. B. H., Bischoff, O., Frandsen, S. T., Mann, J., and Trujillo, J. J.: Remote Sensing for Wind Energy, Tech. Rep. May, 2015.
- 360 Schlipf, D., Schuler, S., Grau, P., Allgöwer, F., and Kühn, M.: Look-ahead cyclic pitch control using lidar, 2010.

- Schlipf, D., Kapp, S., Anger, J., Bischoff, O., Hofsäß, M., Rettenmeier, A., and Kuhn, M.: Prospects of Optimization of Energy Production by LIDAR Assisted Control of Wind Turbines, EWEA 2011 conference proceedings, pp. 1–10, <http://elib.uni-stuttgart.de/opus/volltexte/2013/8585/>, 2011.
- Schlipf, D., Cheng, P. W., and Mann, J.: Model of the Correlation between Lidar Systems and Wind Turbines for Lidar-Assisted Control, 365 *Journal of Atmospheric and Oceanic Technology*, 30, 2233 – 2240, <https://doi.org/10.1175/JTECH-D-13-00077.1>, 2013a.
- Schlipf, D., Schlipf, D. J., and Kühn, M.: Nonlinear model predictive control of wind turbines using LIDAR, in: *Wind Energy*, vol. 16, pp. 1107–1129, John Wiley & Sons, Ltd, <https://doi.org/10.1002/we.1533>, 2013b.
- Schlipf, D., Fleming, P., Haizmann, F., Scholbrock, A., Hofsäß, M., Wright, A., and Cheng, P. W.: Field testing of feedforward collective pitch control on the CART2 using a nacelle-based lidar scanner, in: *Journal of Physics: Conference Series*, vol. 555, p. 012090, IOP 370 Publishing, 2014.
- Schlipf, D., Fürst, H., Raach, S., and Haizmann, F.: Systems Engineering for Lidar-Assisted Control: A Sequential Approach, *Journal of Physics: Conference Series*, 1102, <https://doi.org/10.1088/1742-6596/1102/1/012014>, 2018.
- Scholbrock, A., Fleming, P., Schlipf, D., Wright, A., Johnson, K., and Wang, N.: Lidar-enhanced wind turbine control: Past, present, and future, in: 2016 American Control Conference (ACC), pp. 1399–1406, IEEE, 2016.
- 375 Simley, E. and Pao, L. Y.: A longitudinal spatial coherence model for wind evolution based on large-eddy simulation, in: 2015 American Control Conference (ACC), pp. 3708–3714, IEEE, 2015.
- Simley, E., Pao, L., Frehlich, R., Jonkman, B., and Kelley, N.: Analysis of wind speed measurements using continuous wave LIDAR for wind turbine control, in: 49th AIAA Aerospace Sciences Meeting including the New Horizons Forum and Aerospace Exposition, p. 263, 2011.
- Simley, E., Pao, L., Kelley, N., Jonkman, B., and Frehlich, R.: Lidar wind speed measurements of evolving wind fields, in: 50th AIAA 380 aerospace sciences meeting including the new horizons forum and aerospace exposition, p. 656, 2012.
- Simley, E., Pao, L. Y., Frehlich, R., Jonkman, B., and Kelley, N.: Analysis of light detection and ranging wind speed measurements for wind turbine control, *Wind Energy*, 17, 413–433, <https://doi.org/https://doi.org/10.1002/we.1584>, 2014.
- Simley, E., Fürst, H., Haizmann, F., and Schlipf, D.: Optimizing Lidars for Wind Turbine Control Applications—Results from the IEA Wind Task 32 Workshop, *Remote Sensing*, 10, 863, <https://doi.org/10.3390/rs10060863>, 2018.
- 385 Simley, E., Bortolotti, P., Scholbrock, A., Schlipf, D., and Dykes, K.: IEA Wind Task 32 and Task 37: Optimizing Wind Turbines with Lidar-Assisted Control Using Systems Engineering, *Journal of Physics: Conference Series*, 1618, 042 029, <https://doi.org/10.1088/1742-6596/1618/4/042029>, 2020.
- Veers, P. S.: Three-dimensional wind simulation, Tech. rep., Sandia National Labs., Albuquerque, NM (USA), 1988.
